# Supplementary material for: Synthesis, crystal structure and magnetic properties of the Re(ii) complexes NBu4[Re(NO)Br4(L)] (L = pyridine and diazine type ligands)
Source: Royal Society of Chemistry journal article supplement (doi:10.1039/c3dt51699g), 2013-01-01

## SUPPORTING INFORMATION

**Figure S1.** View of a fragment of the packing along the crystallographic *b* axis showing the  $\pi$ - $\pi$  stacking interactions together with the shortest Br $\cdots$ Br contacts (broken lines) in **3**. Cations and hydrogen atoms have been omitted for clarity. Color code: Re, dark green; Br, purple; N, blue; O, red; C, grey.

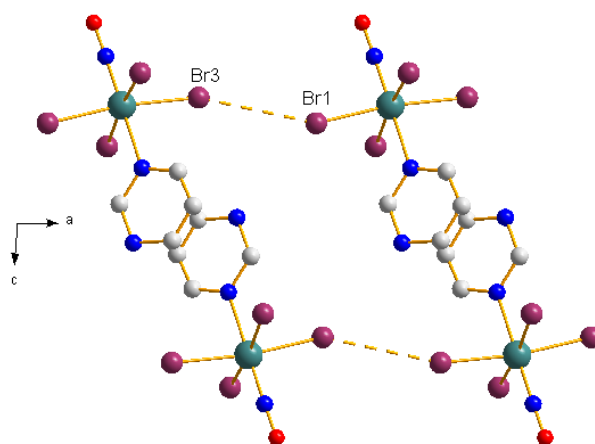

**Figure S2.** View of a fragment of the packing along the crystallographic *b* axis showing the  $\pi$ - $\pi$  stacking interactions together with the shortest Br $\cdots$ Br contacts (broken lines) in **4**. Cations and hydrogen atoms have been omitted for clarity. Color code: Re, dark green; Br, purple; N, blue; O, red; C, grey.

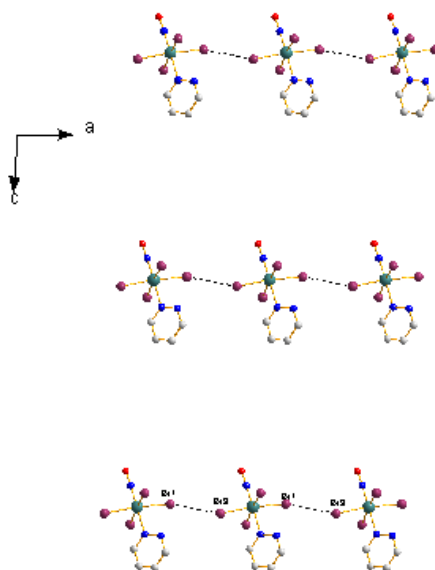

Supplement: c3dt51699g.pdf [file c3dt51699g.pdf]
